# Supplementary material for: CE-DYNAM (v1): a spatially explicit process-based carbon erosion scheme for use in Earth system models
Source: Copernicus journal article supplement (doi:10.5194/gmd-13-1201-2020), 2020-03-17

## S1 Spatial variability of the floodplain deposition factor ( $f$ )

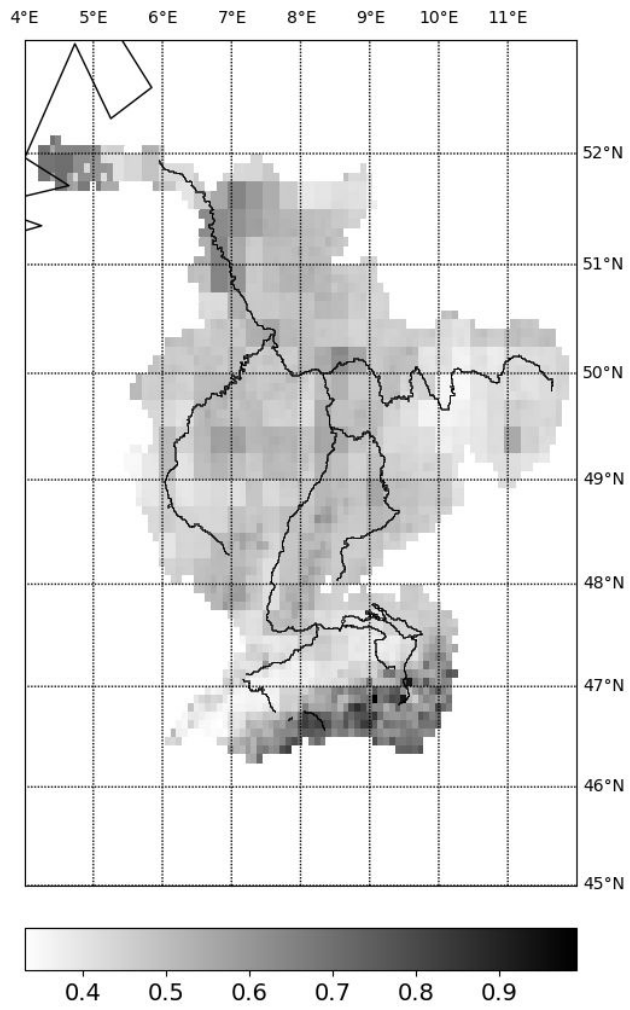

## S2 Spatial variability of the sediment residence time ( $\tau$ )

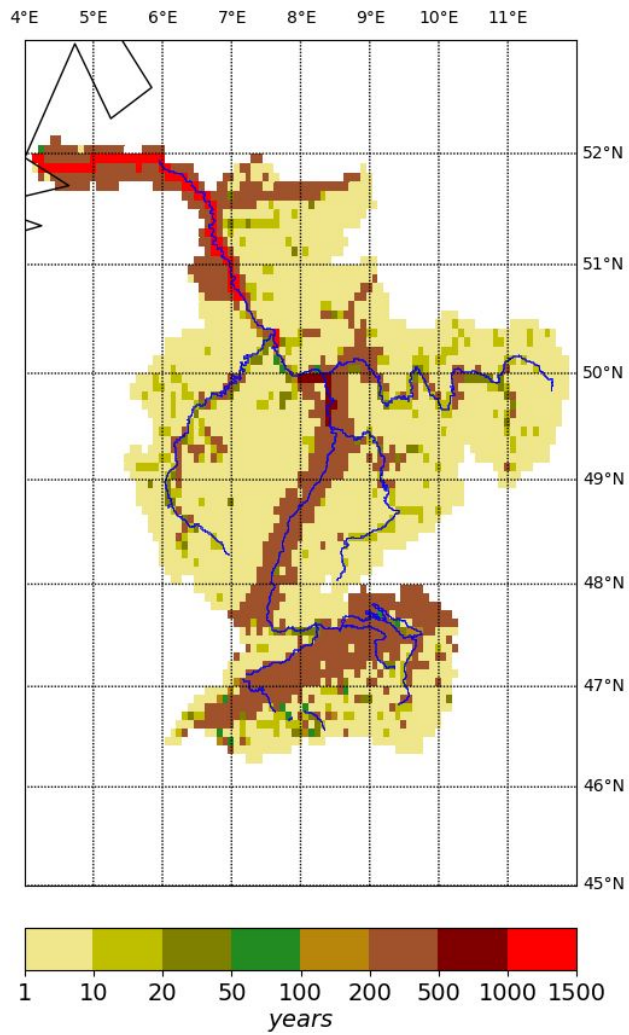

### S3 Rhine subbasins

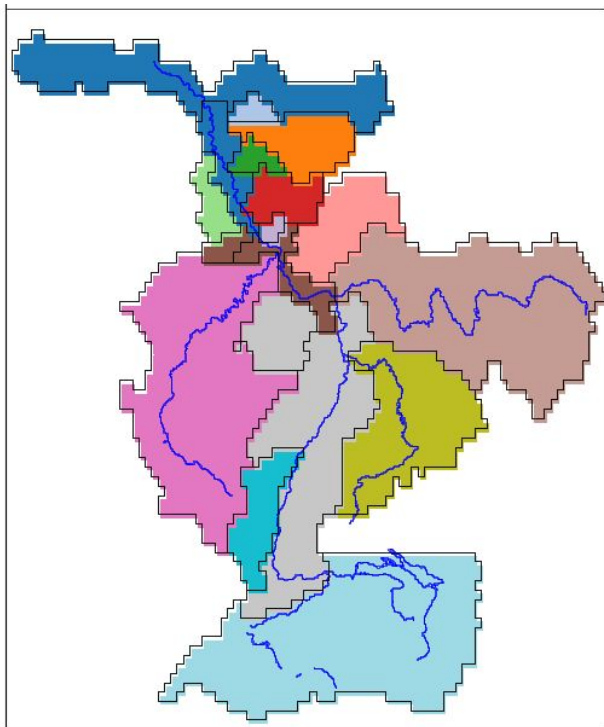

**S4 A: Erosion-induced C replacement under climate change and land use change**

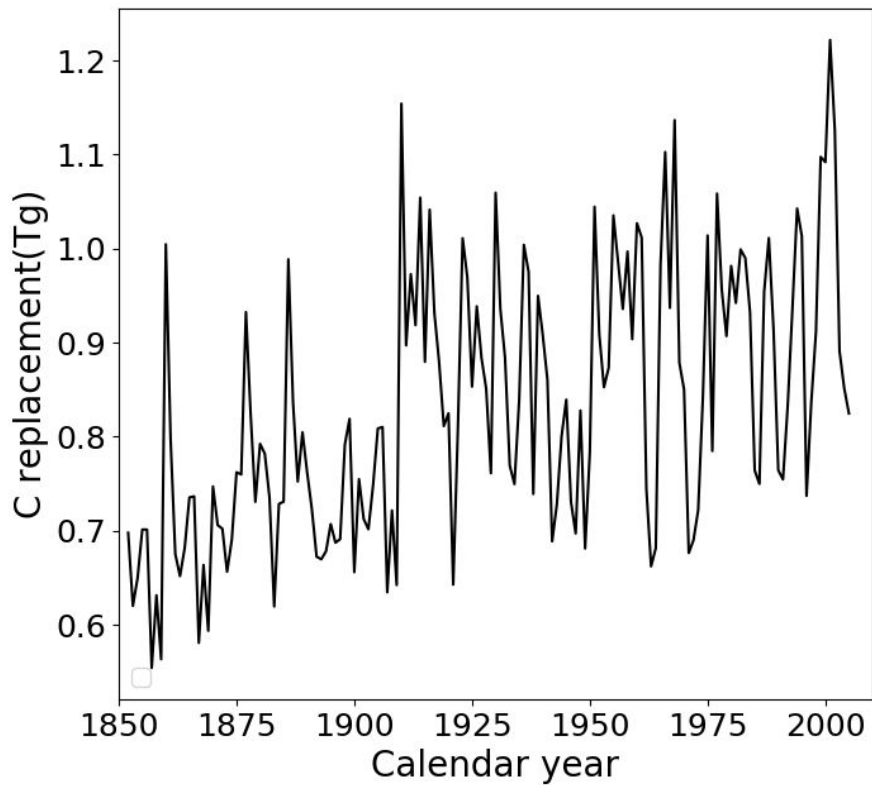

**S4 B: Erosion-induced C replacement under land use change only**

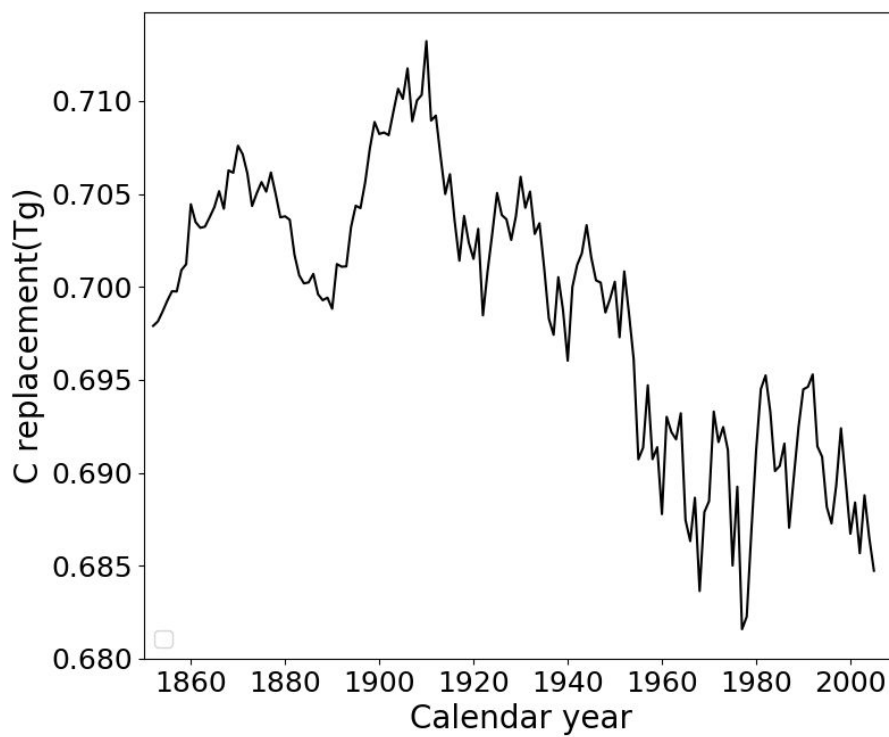

Supplement: Supplementary file 1 [file Supplementary_material.pdf › gmd-2019-110-supplement-version3/Supplementary_material.pdf]
