# Supplementary material for: CE-DYNAM (v1): a spatially explicit process-based carbon erosion scheme for use in Earth system models
Source: Copernicus journal article supplement (doi:10.5194/gmd-13-1201-2020), 2020-03-17
Supplement: Supplementary file [file gmd-13-1201-2020-supplement-title-page.pdf › gmd-13-1201-2020-supplement-title-page.pdf]

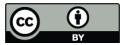

## *Supplement of*

# **CE-DYNAM (v1): a spatially explicit process-based carbon erosion scheme for use in Earth system models**

**Victoria Naipal et al.**

*Correspondence to:* Victoria Naipal (vnaipal24@gmail.com)

- gmd-13-1201-2020-supplement-title-page.pdf
- gmd-2019-110-supplement-version3
  - C\_code
    - \* D.py
    - \* README.txt
    - \* Run\_eq.py
    - \* Run\_tr.py
    - \* func1.py
    - \* func1\_tr.py
    - \* func2.py
    - \* func2\_tr.py
    - \* mod\_append.f90
    - \* mod\_sorting.f90
    - \* rootprofile.py
    - \* routing\_main\_all.f90
    - \* routing\_main\_basin.f90
  - E\_code
    - \* C\_factor.f90
    - \* C\_factor.py
    - \* README.txt
    - \* R\_factor.py
    - \* data\_processing\_part1.ksh
    - \* data\_processing\_part2.ksh
    - \* erosion.f90
    - \* erosion.py
    - \* erosion\_per\_PFT.py
    - \* erosivity.f90

- \* sdii.f90
- \* sdii.py
- Supplementary\_material.pdf

The copyright of individual parts of the supplement might differ from the CC BY 4.0 License.
